# Supplementary material
Source: PubMed Central journal article supplement (PMC3543012)
Supplement: supp_M112.421008_Brown_3647_Supplemental_final.pdf [file supp_M112.421008_Brown_3647_Supplemental_final.pdf]

**The *E. coli* toxin MqsR destabilizes the transcriptional repression complex formed between the antitoxin MqsA and the *mqsRA* operon promoter**

Breann L. Brown, Dana M. Lord, Simina Grigoriu, Wolfgang Peti, Rebecca Page

**TABLE S1. PCR primers used to generate templates for T7 RNA polymerase *in vitro* transcription.** *F* indicates forward primer and *R* indicates reverse primer. The T7 promoter sequence is underlined and the bases incorporated into mRNA during transcription are in bold.

| RNA         | Transcript size (nt) | Primer Name                  | Sequence (5' - 3')                                   |
|-------------|----------------------|------------------------------|------------------------------------------------------|
| <i>mqsA</i> | 415                  | PT7- <i>mqsRA</i> - <i>F</i> | <u>TAATACGACTCACTATAGGGAGA</u> <b>AAGGAGATATACAT</b> |
|             |                      | PT7- <i>mqsA</i> - <i>R</i>  | TTAACGGATTTCATTCAATAGTTCTGG                          |
| <i>mqsR</i> | 315                  | PT7- <i>mqsRA</i> - <i>F</i> | <u>TAATACGACTCACTATAGGGAGA</u> <b>AAGGAGATATACAT</b> |
|             |                      | PT7- <i>mqsR</i> - <i>R</i>  | TTACTTCTCCTTAAACGAGACGAT                             |

**TABLE S2. PCR primers used to generate DNA for EMSA experiments.** *F* indicates forward primer and *R* indicates reverse primer.

| DNA           | Transcript size (nt) | Primer Name              | Sequence (5' - 3')                      |
|---------------|----------------------|--------------------------|-----------------------------------------|
| <i>PmqsRA</i> | 234                  | <i>PmqsRA</i> - <i>F</i> | GTGATGCCTGACTCCAGCTT                    |
|               |                      | <i>PmqsRA</i> - <i>R</i> | CGTGTATGTGGTGTGCGTTT                    |
| Pal1          | 26                   | Pal1- <i>F</i>           | TCTAACTAACCTTTT <del>AGG</del> TGCTTTTT |
|               |                      | Pal1- <i>R</i>           | AAAAAGCACCTAAAAGGTTAGTTAGA              |
| Pal2          | 26                   | Pal2- <i>F</i>           | TGTAATTAACCTTTT <del>AGG</del> TATAACT  |
|               |                      | Pal2- <i>R</i>           | AGTTATAACCTAAAAGGTTAATTACA              |

**A**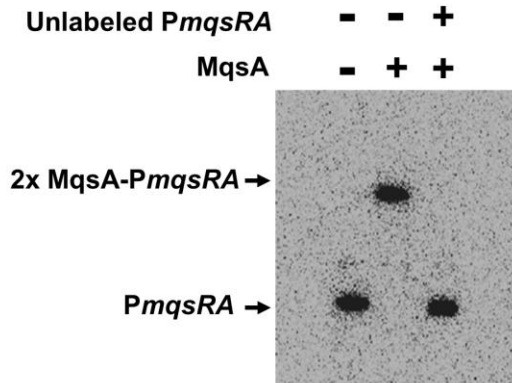**B**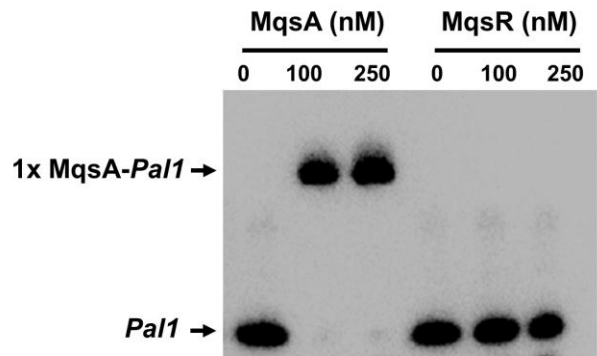

**Supplemental Figure S1. MqsA binds *PmqsRA* specifically.** (A) EMSA in the presence and absence of unlabeled *PmqsRA* DNA. In lane 2, MqsA was incubated with 100 fmol of biotin-labeled *PmqsRA* DNA. Lane 3 is the same as lane 2 except MqsA was incubated first with a 2-fold excess of unlabeled *PmqsRA* DNA. (B) EMSA with increasing amounts of MqsA (lanes 2-3) or MqsR (5-6) incubated with 100 fmol biotin-labeled Palindrome 1 (*Pal1*).

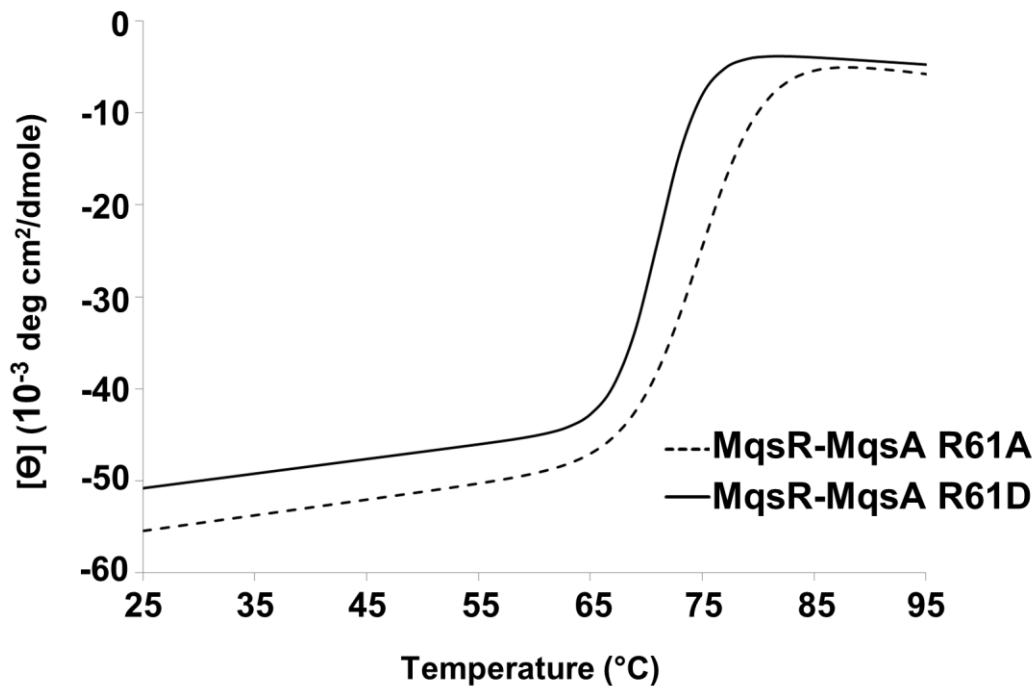

**Supplemental Figure S2.** Thermal denaturation at 208 nm of the MqsR-MqsA R61 mutants. The  $T_m$  for MqsR-MqsA R61A (5  $\mu$ M, dashed line) and MqsR-MqsA R61D (5  $\mu$ M, solid line) are  $75.2 \pm 0.4^\circ\text{C}$  and  $70.5 \pm 1.0^\circ$ , respectively.
